# Supplementary material for: A new chemo-enzymatic approach to synthesize rare sugars using an engineered glycoside-3-oxidase
Source: Royal Society of Chemistry journal article supplement (doi:10.1039/d4gc04449e), 2024-12-17
Supplement: d4gc04449e1.pdf [file d4gc04449e1.pdf]

## SUPPORTING INFORMATION

### **A new chemo-enzymatic approach to synthesize rare sugars using an engineered glycoside-3-oxidase**

André Taborda<sup>1</sup>, Márcia Rénio<sup>1</sup>, M. Rita Ventura<sup>1\*</sup> and Lígia O. Martins<sup>1\*</sup>

*<sup>1</sup>Instituto de Tecnologia Química e Biológica António Xavier, Universidade Nova de Lisboa, Av da República, 2780-157 Oeiras, Portugal*

\*Corresponding authors

## Table of contents

|                                                                                                                                                                                                         |    |
|---------------------------------------------------------------------------------------------------------------------------------------------------------------------------------------------------------|----|
| Fig. S1. Stability of the variant 16F10.....                                                                                                                                                            | 2  |
| Fig. S2. Thermal inactivation at 40 °C of some evolutionary intermediates. ....                                                                                                                         | 3  |
| Fig. S3. Distances matrix among the mutations introduced during DE and between the FAD. ....                                                                                                            | 4  |
| Fig. S4. Example of apparent steady-state kinetics of wild-type and 16F10 variant. ....                                                                                                                 | 5  |
| Fig. S5. <sup>1</sup> H NMR spectrum of 1-O-Benzyl-3-keto- $\alpha/\beta$ -D-glucopyranoside.....                                                                                                       | 6  |
| Fig. S6. <sup>13</sup> C NMR spectrum of 1-O-Benzyl-3-keto- $\alpha/\beta$ -D-glucopyranoside. ....                                                                                                     | 7  |
| Fig. S7. <sup>1</sup> H NMR spectrum of 1-O-Benzyl-3-keto- $\beta$ -D-glucopyranoside.....                                                                                                              | 8  |
| Fig. S8. <sup>13</sup> C NMR spectrum of 1-O-Benzyl-3-keto- $\beta$ -D-glucopyranoside.....                                                                                                             | 9  |
| Fig. S9. <sup>1</sup> H NMR spectrum of 1-O-Benzyl- $\beta$ -D-allopyranoside. ....                                                                                                                     | 10 |
| Fig. S10. <sup>13</sup> C NMR spectrum of 1-O-Benzyl- $\beta$ -D-allopyranoside. ....                                                                                                                   | 11 |
| Fig. S11. <sup>1</sup> H NMR spectrum of D-allose. ....                                                                                                                                                 | 12 |
| Fig. S12. <sup>13</sup> C NMR spectrum of D-allose. ....                                                                                                                                                | 13 |
| Table S1. Bacterial strains, plasmids, and primers were used in this study. ....                                                                                                                        | 14 |
| Table S2. Programs carried out in thermocycler for PCR performed in this study. ....                                                                                                                    | 17 |
| Table S3. Summary of the variants obtained by directed evolution.....                                                                                                                                   | 18 |
| Table S4. Summary of production yields for all directed evolution intermediates. ....                                                                                                                   | 19 |
| Table S5. Apparent steady-state catalytic parameters for D-Glc in enzymes described in literature.....                                                                                                  | 20 |
| Table S6. Optimal pH and apparent steady-state catalytic parameters for D-Glc of variants where mutation P336S was inserted or removed.....                                                             | 21 |
| Table S7. Summary of stability properties of the evolutionary intermediates. ....                                                                                                                       | 22 |
| Table S8. Optimal pH and apparent steady-state catalytic parameters for D-Glc of variants constructed using site-directed mutagenesis to assess the role of mutations G366S, A75T, A206T and Q295H..... | 23 |
| Table S9. Summary of the described methods to synthesize D-allose and 3-keto-sugars. ....                                                                                                               | 24 |

## Supplementary Figures

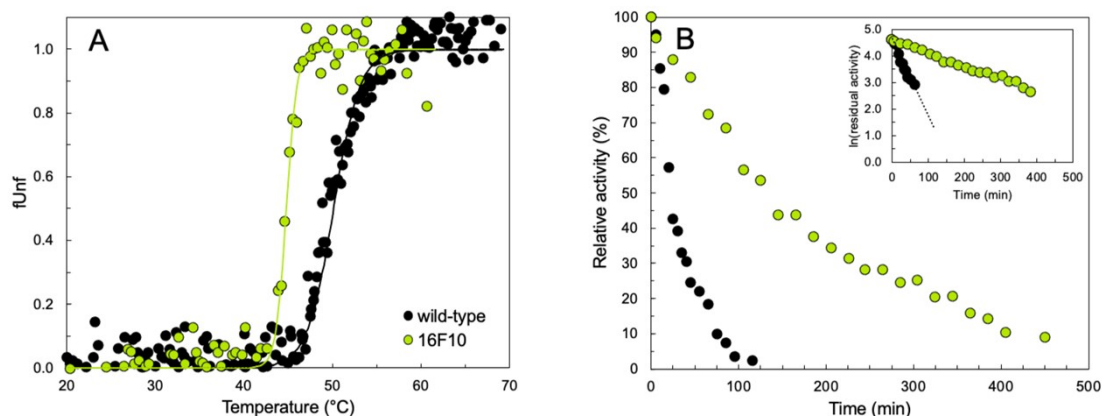

**Fig. S1. Stability of the variant 16F10.** (A) Comparison of thermostability between wild-type (black) and 16F10 variant (light green), assessed by steady-state fluorescence (Excitation at 296 nm and emission at 340 nm). The estimated apparent melting temperatures ( $T_m^{APP}$ ) were  $49 \pm 2$  °C for the wild-type and  $44 \pm 2$  °C for 16F10. (B) Thermal inactivation profile of wild-type (in black) and 16F10 (in light green) at 40 °C. The residual activity was measured in a reaction mixture containing 0.5 M D-Glc, 0.1 mM AAP, 1 mM DCHBS, 8 U/ml HRP in 100 mM sodium phosphate buffer (pH 7.5). The inset shows the logarithm of residual activity versus incubation time. The obtained half-life at 40 °C ( $t_{1/2}^{40\text{ °C}}$ ) was  $27 \pm 2$  min and  $187 \pm 30$  min for the wild-type and 16F10, respectively.

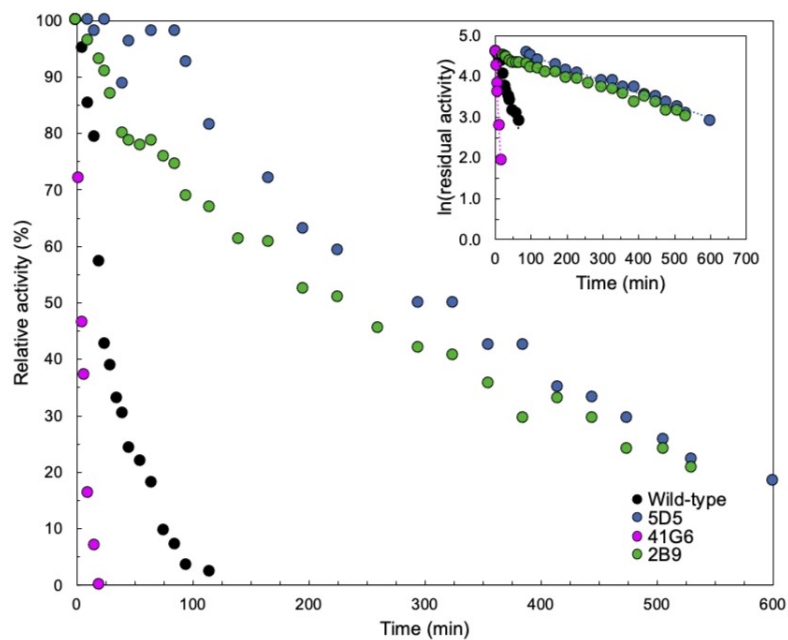

**Fig. S2. Thermal inactivation at 40 °C of some evolutionary intermediates (5D5, 41G6 and 2B9).** The residual activity was measured in a reaction mixture containing 0.5 M D-Glc, 0.1 mM AAP, 1 mM DCHBS, 8 U/ml HRP in 100 mM sodium phosphate buffer (pH 7.5). The inset shows the logarithm of residual activity versus incubation time. The estimated half-life at 40 °C ( $t_{1/2}^{40\text{ }^\circ\text{C}}$ ) was  $27 \pm 2$  min for the wild-type (in black),  $374 \pm 82$  min for 5D5 variant (in dark blue),  $5 \pm 1$  min for 41G6 (in purple) and  $291 \pm 30$  min for 2B9 (in green).

| Distances (Å) |                   |       |       |       |       |       |       |       |       |
|---------------|-------------------|-------|-------|-------|-------|-------|-------|-------|-------|
| Mutation      | FAD <sup>N5</sup> | G366S | A206T | Q295H | P336S | A327V | A335T | I357V | D383N |
| G366S         | 11.4              |       | 25.8  | 11.3  | 13.6  | 10.6  | 14.6  | 24.6  | 37.4  |
| A206T         | 18.1              |       |       | 31.9  | 35.4  | 20.5  | 36.6  | 24.3  | 48.5  |
| Q295H         | 12.5              |       |       |       | 10.8  | 18.7  | 14.2  | 35.4  | 28.5  |
| P336S         | 20.1              |       |       |       |       | 17.2  | 3.8   | 37.0  | 37.8  |
| A327V         | 12.8              |       |       |       |       |       | 17.1  | 23.5  | 45    |
| A335T         | 20.5              |       |       |       |       |       |       | 36.6  | 41.5  |
| I357V         | 28.7              |       |       |       |       |       |       |       | 56.9  |
| D383N         | 32.9              |       |       |       |       |       |       |       |       |

**Fig. S3. Distances matrix among the mutations introduced in the hit variant 16F10 and between them and FAD.** The distances are colored by a color gradient of red (lower distances) and blue (greater distances).

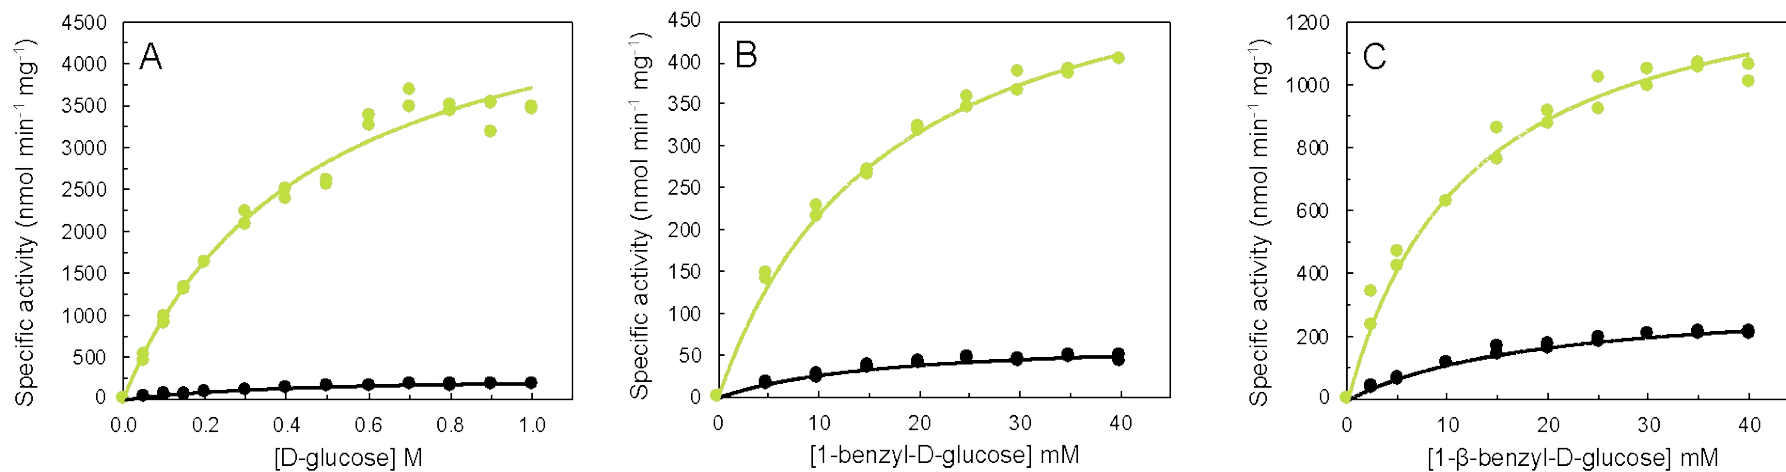

**Fig. S4. Example of apparent steady-state kinetics of wild-type and 16F10 variant.** Kinetics were obtained for (A) D-Glc, (B) 1-O-Benzyl- $\alpha/\beta$ -D-glucopyranoside and (C) 1-O-benzyl- $\beta$ -glucopyranoside. The data in black correspond to the wild-type and in light green to 16F10 variant. All measurements were performed at 37 °C in 100 mM sodium phosphate buffer at optimal pH using the HRP-AAP/DCHBS coupled assay. The dots represent the experimental enzymatic activities measured, and the lines are the fit of the experimental data to the Michaelis-Menten equation using OriginLab software.

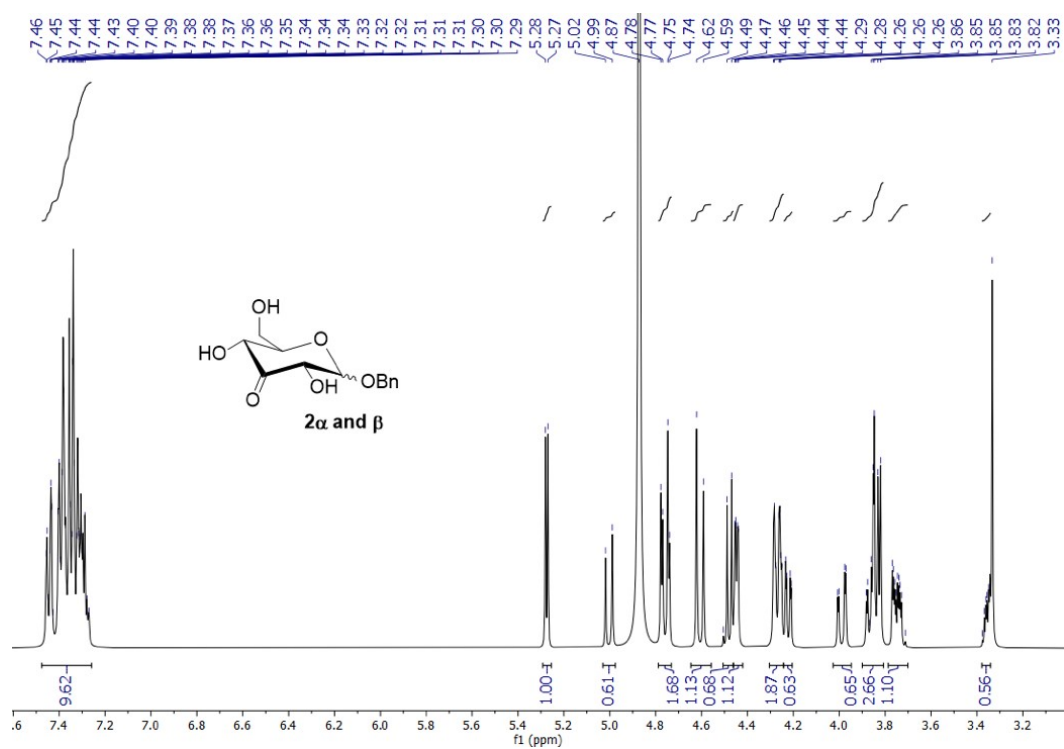

**Fig. S5.**  $^1\text{H}$  NMR spectrum of 1-O-Benzyl-3-keto- $\alpha/\beta$ -D-glucopyranoside **2 $\alpha$**  and **2 $\beta$** .

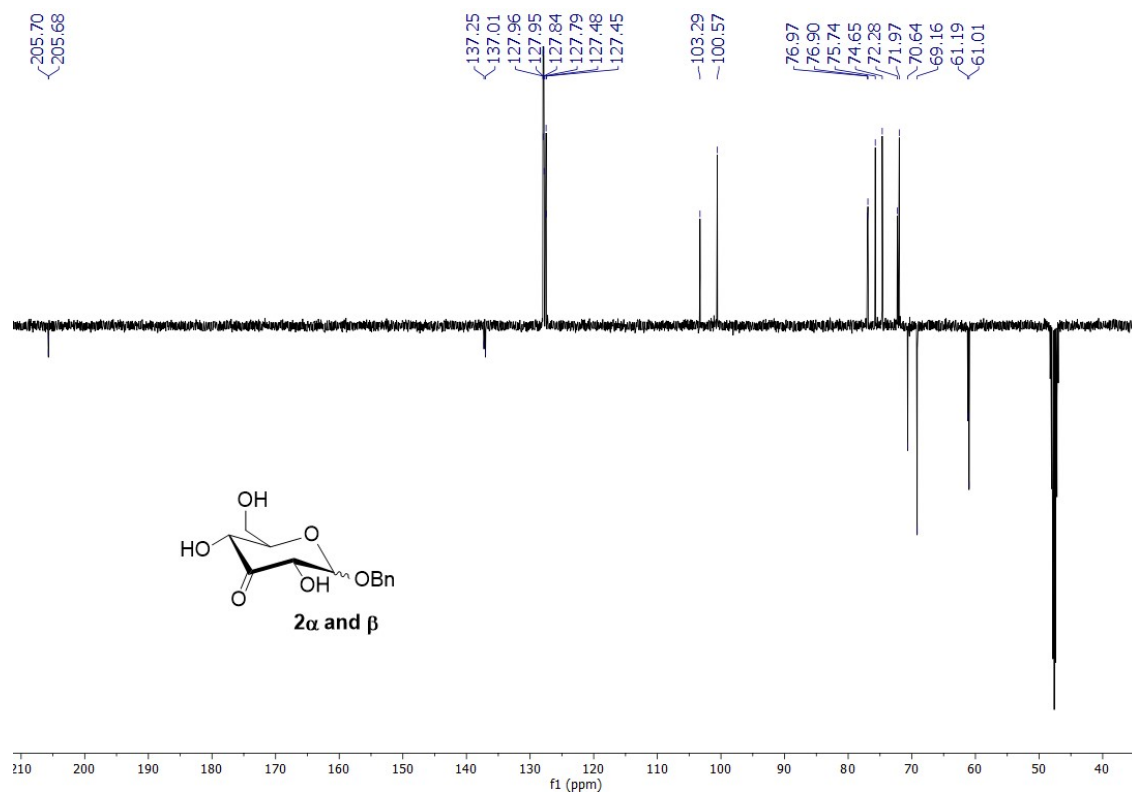

**Fig. S6.**  $^{13}\text{C}$  NMR spectrum of 1-O-Benzyl-3-keto- $\alpha/\beta$ -D-glucopyranoside 2 $\alpha$  and 2 $\beta$ .



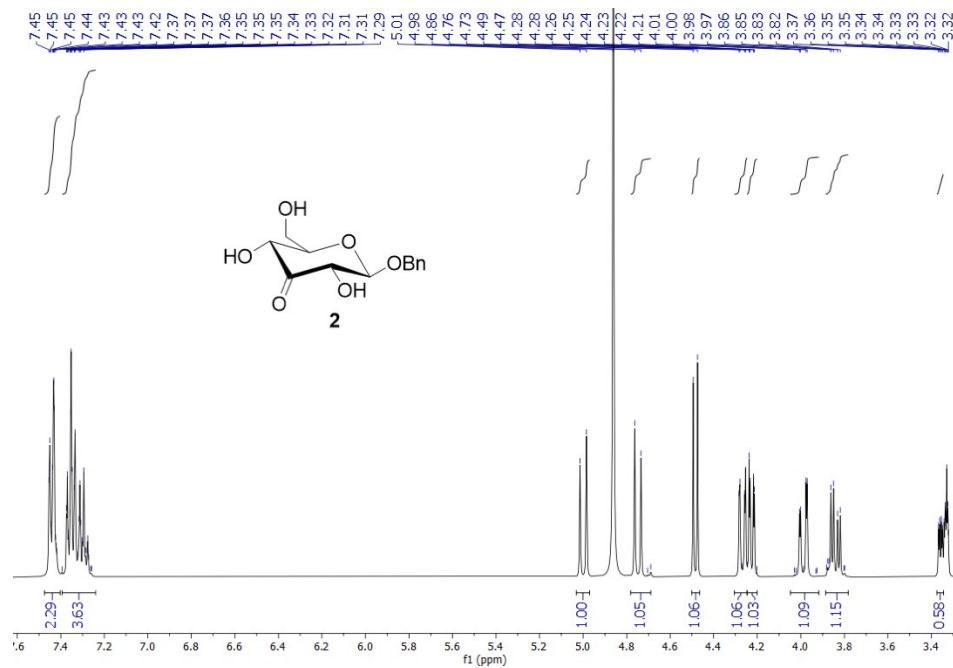

**Fig. S7.** <sup>1</sup>H NMR spectrum of 1-O-Benzyl-3-keto-β-D-glucopyranoside 2β anomer.

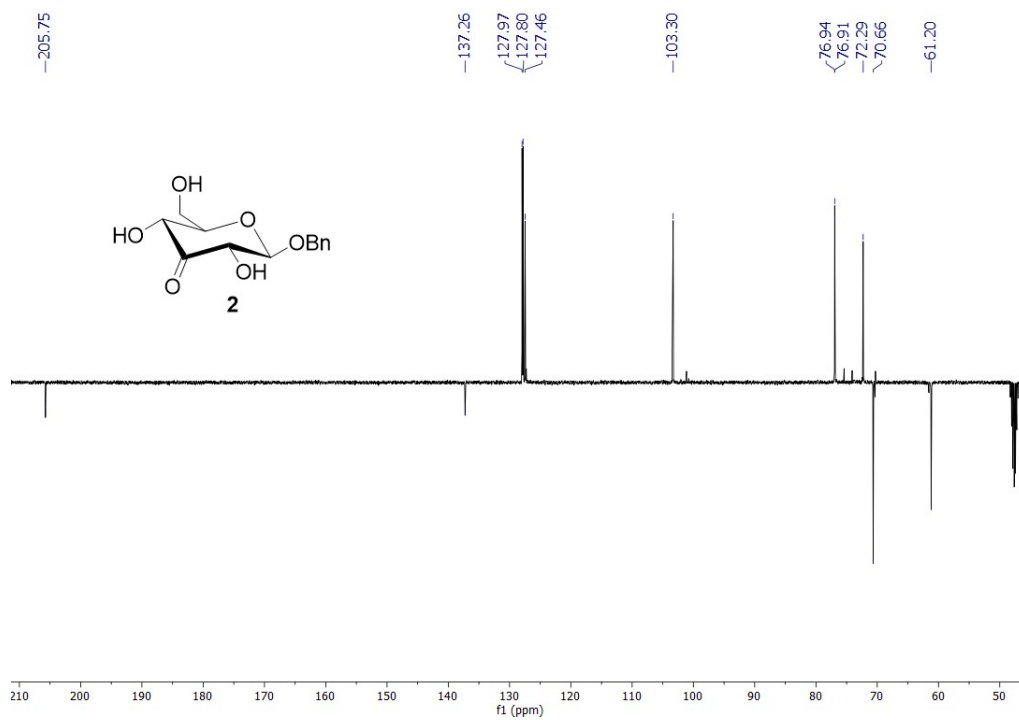

**Fig. S8.**  $^{13}\text{C}$  NMR spectrum of 1-O-Benzyl-3-keto- $\beta$ -D-glucopyranoside 2 $\beta$ .

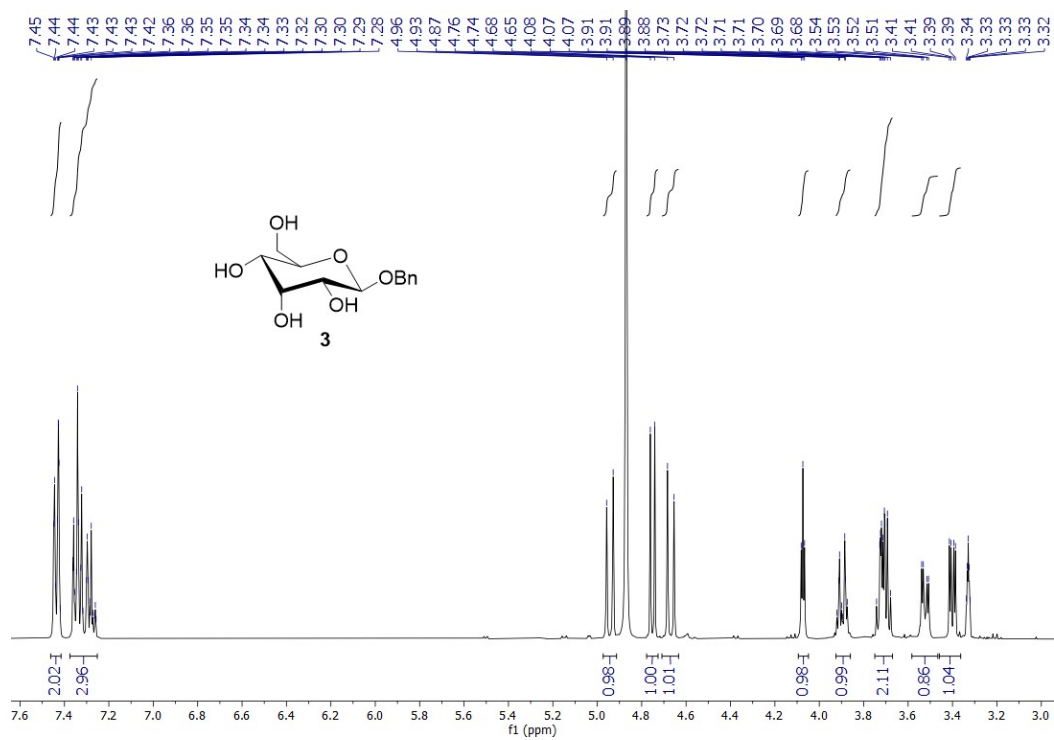

**Fig. S9.**  $^1\text{H}$  NMR spectrum of 1-O-Benzyl- $\beta$ -D-allopyranoside 3.

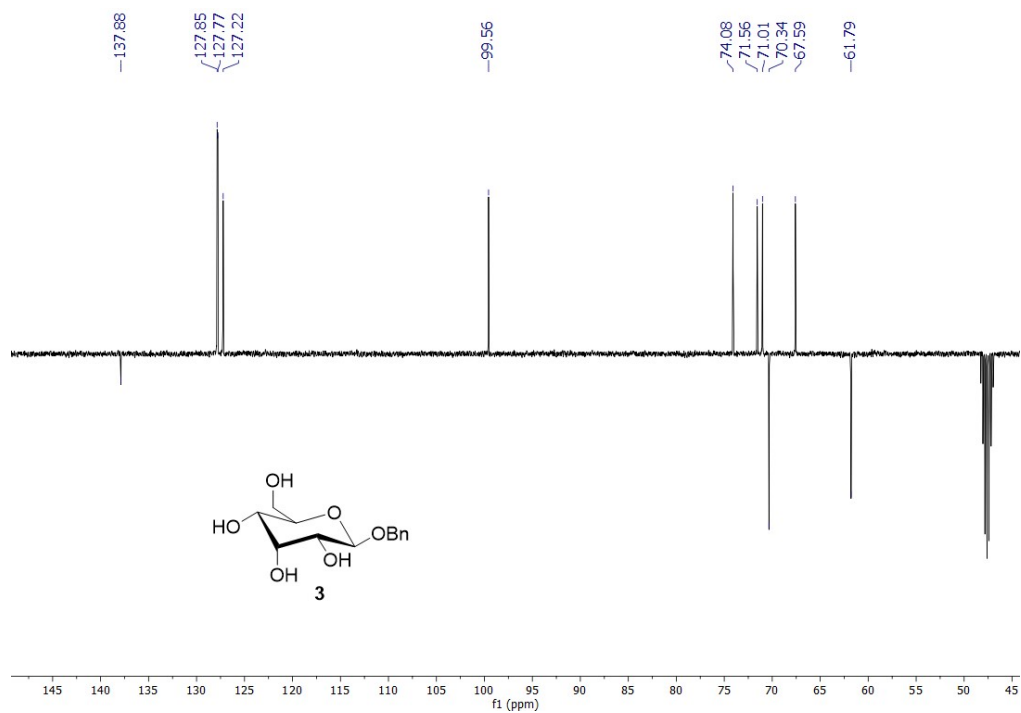

**Fig. S10.**  $^{13}\text{C}$  NMR spectrum of 1-O-Benzyl-β-D-allopyranoside 3.

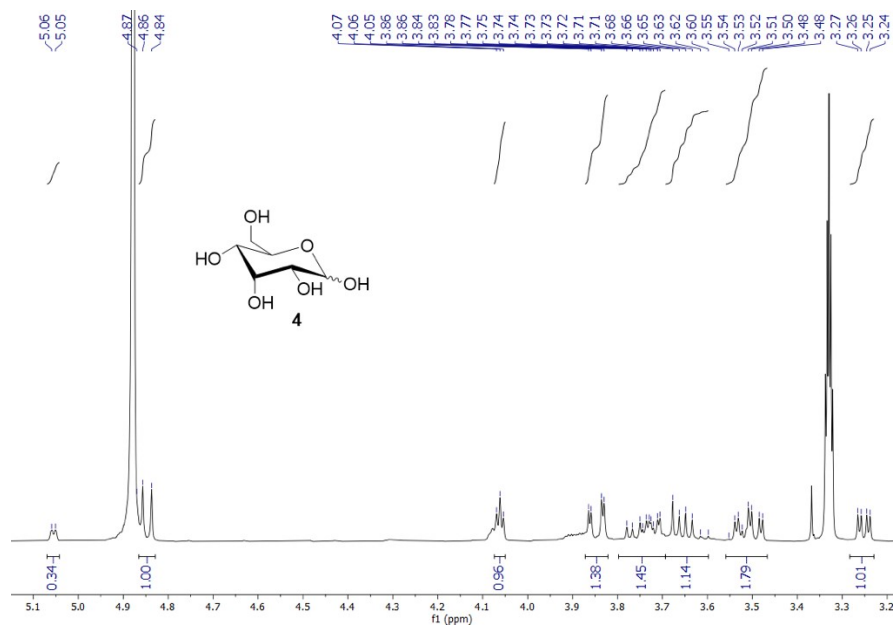

**Fig. S11.**  $^1\text{H}$  NMR spectrum of D-allose 4.

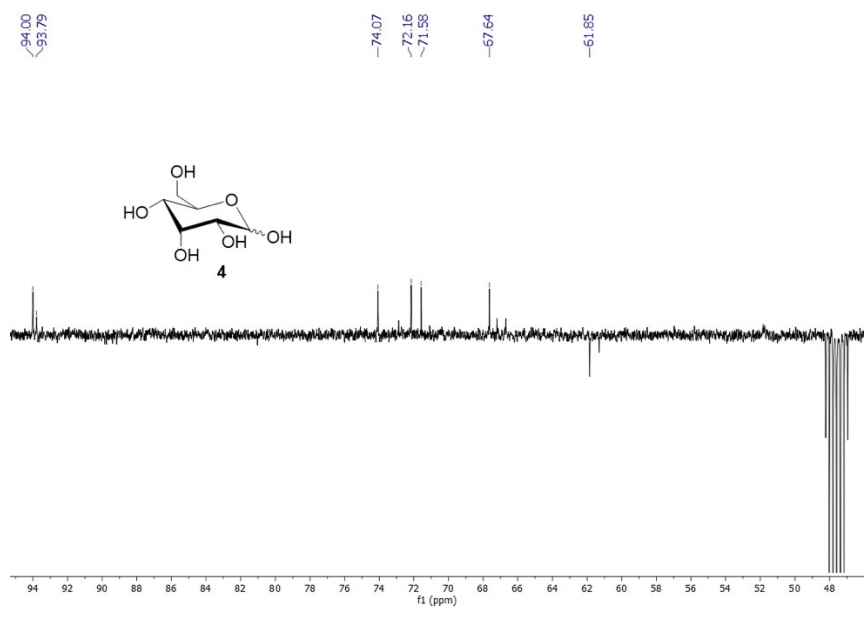

**Fig. S12.**  $^{13}\text{C}$  NMR spectrum of D-allose 4.

## Supplementary Tables

**Table S1.** Bacterial strains, plasmids, and primers were used in this study. F indicates forward primers, and R reverse primers.

| Strains, Plasmids, or Primers     | Genotype, property, or sequence                                                                                                                                                                                                                                                                                                                                                     | Reference or source                          |
|-----------------------------------|-------------------------------------------------------------------------------------------------------------------------------------------------------------------------------------------------------------------------------------------------------------------------------------------------------------------------------------------------------------------------------------|----------------------------------------------|
| <b>Strains</b>                    |                                                                                                                                                                                                                                                                                                                                                                                     |                                              |
| <i>E. coli</i> DH5 $\alpha$       | F <sup>-</sup> $\phi$ 80 <i>lacZ</i> $\Delta$ M15 $\Delta$ ( <i>lacZYA argF</i> )U169 <i>recA1 endA1 hsdR17</i> (r <sub>K</sub> <sup>-</sup> , m <sub>K</sub> <sup>+</sup> ) <i>phoA supE44</i> $\lambda$ <sup>-</sup> <i>thi-1 gyrA96 relA1</i>                                                                                                                                    | Novagen                                      |
| <i>E. coli</i> 10G elite          | F <sup>-</sup> <i>mcrA</i> $\Delta$ ( <i>mrr-hsdRMS-mcrBC</i> ) <i>endA1 recA1</i> $\phi$ 80 <i>dlacZ</i> $\Delta$ M15 $\Delta$ <i>lacX74 araD139</i> $\Delta$ ( <i>ara,leu</i> )7697 <i>galU galK rpsL</i> (StrR) <i>nupG</i> $\lambda$ <sup>-</sup> <i>tonA</i>                                                                                                                   | Lucigen corporation – Biosearch Technologies |
| <i>E. coli</i> KRX                | [F <sup>'</sup> , <i>traD36, DompP, roa</i> <sup>+</sup> B <sup>+</sup> , <i>lacI</i> <sup>q</sup> , D( <i>lacZ</i> )M15] <i>DompT, endA1, recA1, gyrA96</i> (Nal <sup>r</sup> ), <i>thi-1, hsdR17</i> (r <sub>K</sub> <sup>-</sup> , m <sub>K</sub> <sup>+</sup> ), <i>e14</i> <sup>-</sup> (McrA <sup>-</sup> ), <i>relA1, supE44, D(lac-proAB), D(rhaBAD)::T7</i> RNA polymerase | Promega                                      |
| <i>E. coli</i> Rosetta(DE3) pLysS | F <sup>-</sup> <i>ompT hsdSB</i> (rB <sup>-</sup> mB <sup>-</sup> ) <i>gal dem</i> (DE3) pLysSRARE (CamR)                                                                                                                                                                                                                                                                           | Novagen                                      |
| <b>Plasmids</b>                   |                                                                                                                                                                                                                                                                                                                                                                                     |                                              |
| pET15b                            | Cloning vector with a T7 promoter with a N-terminal T7tag and C-terminal 6xHis tag; amp <sup>r</sup>                                                                                                                                                                                                                                                                                | Novagen                                      |
| pSM1                              | pET15b with <i>psg3ox</i> gene cloned into <i>NdeI</i> and <i>XhoI</i> sites                                                                                                                                                                                                                                                                                                        | 1                                            |
| pAT-3                             | pET15b with <i>psg3ox</i> gene cloned into <i>NdeI</i> and <i>XhoI</i> sites carrying the mutation A75T introduced in the by site-directed mutagenesis                                                                                                                                                                                                                              | This work                                    |
| pAT-4                             | pET15b with <i>psg3ox</i> gene cloned into <i>NdeI</i> and <i>XhoI</i> sites carrying the mutation A206T introduced in the by site-directed mutagenesis                                                                                                                                                                                                                             | This work                                    |
| pAT-5                             | pET15b with <i>psg3ox</i> gene cloned into <i>NdeI</i> and <i>XhoI</i> sites carrying the mutation Q295H introduced in the by site-directed mutagenesis                                                                                                                                                                                                                             | This work                                    |
| pAT-6                             | pAT-1A1 with <i>psg3ox</i> gene cloned into <i>NdeI</i> and <i>XhoI</i> sites carrying the mutation G366S and Q295H introduced in the by site-directed mutagenesis                                                                                                                                                                                                                  | This work                                    |
| pAT-9                             | pET15b with <i>psg3ox</i> gene cloned into <i>NdeI</i> and <i>XhoI</i> sites carrying the mutation S336P introduced in the by site-directed mutagenesis                                                                                                                                                                                                                             | This work                                    |
| pAT-10                            | pAT-2G4 with <i>psg3ox</i> gene cloned into <i>NdeI</i> and <i>XhoI</i> sites carrying the mutation P336S introduced in the by site-directed mutagenesis                                                                                                                                                                                                                            | This work                                    |
| pAT-11                            | pAT-7E9 with <i>psg3ox</i> gene cloned into <i>NdeI</i> and <i>XhoI</i> sites carrying the mutation P336S introduced in the by site-directed mutagenesis                                                                                                                                                                                                                            | This work                                    |

|           |                                                                                                                                                                                                                            |           |
|-----------|----------------------------------------------------------------------------------------------------------------------------------------------------------------------------------------------------------------------------|-----------|
| pAT-12    | pAT-2B9 with <i>psg3ox</i> gene cloned into <i>NdeI</i> and <i>XhoI</i> sites carrying the mutation P336S introduced in the by site-directed mutagenesis                                                                   | This work |
| pAT-1A1   | pET15b with <i>psg3ox</i> gene cloned into <i>NdeI</i> and <i>XhoI</i> sites carrying the mutation G366S introduced in the first round of directed evolution                                                               | This work |
| pAT-5D5   | pET15b with <i>psg3ox</i> gene cloned into <i>NdeI</i> and <i>XhoI</i> sites carrying the mutation G366S, A75T, A206T, Q295H introduced in the second round of directed evolution                                          | This work |
| pAT-41G6  | pET15b with <i>psg3ox</i> gene cloned into <i>NdeI</i> and <i>XhoI</i> sites carrying the mutation G366S, A75T, A206T, Q295H, P336S introduced in the third round of directed evolution                                    | This work |
| pAT-7E9   | pET15b with <i>psg3ox</i> gene cloned into <i>NdeI</i> and <i>XhoI</i> sites carrying the mutation G366S, A75T, A206T, Q295H, P336S, D222G, A327V introduced in the fourth round of directed evolution                     | This work |
| pAT-2G4   | pET15b with <i>psg3ox</i> gene cloned into <i>NdeI</i> and <i>XhoI</i> sites carrying the mutation G366S, A75T, A206T, Q295H, P336S, A327V, V416I, K420R introduced in the fourth round of directed evolution              | This work |
| pAT-2B9   | pET15b with <i>psg3ox</i> gene cloned into <i>NdeI</i> and <i>XhoI</i> sites carrying the mutation G366S, A75T, A206T, Q295H, P336S, D222G, A327V, V416I, K420R, A335T introduced in the fifth round of directed evolution | This work |
| pAT-6E3   | pET15b with <i>psg3ox</i> gene cloned into <i>NdeI</i> and <i>XhoI</i> sites carrying the mutation G366S, A206T, Q295H, P336S, A327V, A335T introduced in the sixth round of directed evolution                            | This work |
| pAT-16F10 | pET15b with <i>psg3ox</i> gene cloned into <i>NdeI</i> and <i>XhoI</i> sites carrying the mutation G366S, A206T, Q295H, P336S, A327V, A335T, D383N, I357V introduced in the seventh round of directed evolution            | This work |

### Primers

|                        |                                                        |           |
|------------------------|--------------------------------------------------------|-----------|
| <i>PsG3Ox_A75T_FW</i>  | 5'-GGGTCCCGGTACCGGTGCTGCAACAGTG-3'                     | This work |
| <i>PsG3Ox_A75T_RV</i>  | 5'-CACTGTTGCAGCACCGGTACCGGGACCC-3'                     | This work |
| <i>PsG3Ox_A206T_FW</i> | 5'-GCAGGATGGCACCCCTCGTATGGTCCGGCTC-3'                  | This work |
| <i>PsG3Ox_A206T_RV</i> | 5'-GAGGCCGGACCATACGAGGGTGCCATCCTGC-3'                  | This work |
| <i>PsG3Ox_Q295H_FW</i> | 5'-CTGAACGACCATGCGCAGGTGGTGTTCGCG-3'                   | This work |
| <i>PsG3Ox_Q295H_RV</i> | 5'-CGCGAACACCACCTGCGCATGGTCGTTTCAG -3'                 | This work |
| <i>PsG3Ox_P336S_FW</i> | 5'-CGGACGAGGCGTCTTCCACGGCCAGATC-3'                     | This work |
| <i>PsG3Ox_P336S_RV</i> | 5'-GATCTGGCCGTGGAAGGACGCCTCGTCCG-3'                    | This work |
| <i>PsG3Ox_S336P_FW</i> | 5'-CGGACGAGGCGCCCTTCCACGGCCAGATC-3'                    | This work |
| <i>PsG3Ox_S336P_RV</i> | 5'-GATCTGGCCGTGGAAGGGCGCCTCGTCCG-3'                    | This work |
| pET21_FW               | 5'-CTTCCCACATCGGTGATGTCGGCGATATAG-3'                   | This work |
| pET21_RV               | 5'-CCAAGGGGTTATGCTAGTTATTGCTCAG-3'                     | This work |
| <i>PsG3Ox_GA_FW</i>    | 5'-GCAGCCGGATCCTCGAGCATTATTTAGACAGTCTATTGTCTGATTCGG-3' | This work |



|                     |                                               |           |
|---------------------|-----------------------------------------------|-----------|
| <i>PsG3Ox_GA_RV</i> | 5'-TGGTGCCGCGCGGCAGCCATATGAGCGGTCACCGGTATC-3' | This work |
| pET15b_GA_FW        | 5'-ATGGCTGCCGCGCGGCAC-3'                      | This work |
| pET15b_GA_RV        | 5'-ATGCTCGAGGATCCGGCTG-3'                     | This work |

---

**Table S2.** Programs carried out in thermocycler for the PCRs performed in this study.

|                                                        | <b>Program 1</b><br>(error-prone PCR and<br>last PCR of DNA<br>shuffling) | <b>Program 2</b><br>(vector for epPCR<br>libraries) | <b>Program 3</b><br>(First PCR for DNA<br>shuffling – gene<br>amplification) | <b>Program 4</b><br>(Primerless PCR for DNA<br>shuffling – reassembly) | <b>Program 5</b><br>(Site-directed<br>mutagenesis) |
|--------------------------------------------------------|---------------------------------------------------------------------------|-----------------------------------------------------|------------------------------------------------------------------------------|------------------------------------------------------------------------|----------------------------------------------------|
| <b>Initial denaturation</b>                            | 95 °C – 2 min                                                             | 98 °C – 30s                                         | 95 °C – 5 min                                                                | 96 °C – 3 min                                                          | 95 °C – 4 min                                      |
|                                                        |                                                                           |                                                     |                                                                              | 45 cycles                                                              |                                                    |
|                                                        | 30 cycles                                                                 | 30 cycles                                           | 20 cycles                                                                    | 94 °C – 1min                                                           | 20 cycles                                          |
| <b>Cycles (Denaturation,<br/>Annealing, Extension)</b> | 95 °C – 1 min                                                             | 98 °C – 10s                                         | 95 °C – 1 min                                                                | 59 °C - 1.5 min                                                        | 95 °C – 1 min                                      |
|                                                        | 69 °C – 1 min                                                             | 71 °C – 30s                                         | 55 °C – 1min                                                                 | 56 °C – 1.5 min                                                        | 68 °C – 1.5 min                                    |
|                                                        | 72 °C – 2 min                                                             | 72 °C – 3min                                        | 72 °C – 2 min                                                                | 53 °C – 1.5 min                                                        | 72 °C – 8 min                                      |
|                                                        |                                                                           |                                                     |                                                                              | 50 °C – 1.5 min                                                        |                                                    |
|                                                        |                                                                           |                                                     |                                                                              | 47 °C – 1.5 min                                                        |                                                    |
|                                                        |                                                                           |                                                     | 44 °C – 1.5 min                                                              |                                                                        |                                                    |
|                                                        |                                                                           |                                                     | 41 °C – 1.5 min                                                              |                                                                        |                                                    |
|                                                        |                                                                           |                                                     | 72 °C – 1min + 5s/cycle                                                      |                                                                        |                                                    |
| <b>Final extension</b>                                 | 72 °C – 10 min                                                            | 72 °C – 2 min                                       | 72 °C – 10 min                                                               | 72 °C – 10 min                                                         | 72 °C – 10 min                                     |

**Table S3.** Summary of the variants obtained by directed evolution. The concentration of the mutagenic agent (MnCl<sub>2</sub>) in the epPCR is mentioned for each round of evolution performed. The concentration of substrate (D-Glc) used in the screenings, the number of variants screened in both applied screening approaches ('Activity-on-plate/96-well plate screenings) and the relative activity and stability values to the respective parent are presented. N.D. means not determined.

| Generation                 | [MnCl <sub>2</sub> ]<br>mM | [D-Glc]<br>mM | # Screened<br>variants | Variant      | Mutations                                                           | Relative<br>Activity | Relative<br>Stability |
|----------------------------|----------------------------|---------------|------------------------|--------------|---------------------------------------------------------------------|----------------------|-----------------------|
| 1st                        | 0.05                       | 500           | 7500/100               | <b>1A1</b>   | G366S                                                               | 3.7 ± 0.9            | N.D.                  |
| 2nd                        | 0.05                       | 100           | 4000/900               | <b>5D5</b>   | G366S, A75T, A206T, Q295H                                           | 5.0 ± 0.9            | N.D.                  |
| 3rd                        | 0.05/ 0.1                  | 100           | 10000/2000             | <b>41G6</b>  | G366S, A75T, A206T, Q295H, P336S                                    | 2.3 ± 0.8            | N.D.                  |
| 4th                        | 0.1                        | 50            | 5900/600               | <b>2G4</b>   | G366S, A75T, A206T, Q295H, P336S, A327V, V416I, K420R               | 2.5 ± 0.5            | N.D.                  |
|                            |                            |               |                        | <b>7E9</b>   | G366S, A75T, A206T, Q295H, P336S, A327V, D222G                      | 2.4 ± 0.4            | N.D.                  |
| 5th (epPCR +<br>shuffling) | 0.1                        | 50            | 5100/500               | <b>2B9</b>   | G366S, A75T, A206T, Q295H, P336S, A327V, K420R, V416I, D222G, A335T | 1.0 ± 0.2            | 3.7 ± 0.6             |
| 6th (Shuffling<br>wt/2B9)  | -                          | 50            | 2500/600               | <b>6E3</b>   | G366S, A206T, Q295H, P336S, A327V, A335T                            | 1.3 ± 0.2            | 1.2 ± 0.1             |
|                            |                            |               |                        | 1F3          | G366S, A75T, A206T, Q295H, P336S, A327V, A335T                      | 1.4 ± 0.1            | 0.9 ± 0.1             |
|                            |                            |               |                        | 1D3          | G366S, A206T, Q295H, P336S, A327V, D222G A335T                      | 1.3 ± 0.1            | 1.3 ± 0.2             |
|                            |                            |               |                        | 5F3          | G366S, A206T, Q295H, P336S, A327V, A335T, V416I, K420R              | 1.0 ± 0.2            | 1.1 ± 0.1             |
|                            |                            |               |                        | 11G7         | G366S, A206T, Q295H, P336S, A327V, D222G, A335T, V416I              | 0.8 ± 0.1            | 1.3 ± 0.2             |
| 7th                        | 0.1                        | 50            | 11200/1750             | <b>16F10</b> | G366S, A206T, Q295H, P336S, A327V, A335T, I357V, D383N              | 1.6 ± 0.3            | 1.3 ± 0.1             |

**Table S4. Summary of production yields for all directed evolution intermediates.** The Bradford method was used to determine the total concentration of enzyme. Functional enzyme concentration was quantified by absorbance at 450 nm.

| <b>Variant</b> | <b>Production yield<br/>(mg/L culture)</b> | <b>Ratio functional/<br/>total enzyme</b> |
|----------------|--------------------------------------------|-------------------------------------------|
| Wild-type      | 30                                         | 20 %                                      |
| 1A1            | 62                                         | 25 %                                      |
| 5D5            | 97                                         | 24 %                                      |
| 41G6           | 35                                         | 40 %                                      |
| 2G4            | 20                                         | 50 %                                      |
| 7E9            | 30                                         | 30 %                                      |
| 2B9            | 35                                         | 55 %                                      |
| 6E3            | 33                                         | 35 %                                      |
| 16F10          | 37                                         | 37 %                                      |

**Table S5. Apparent steady-state catalytic parameters for D-Glc in pyranose oxidases described in literature. nd - not detected**

| Origin    | Microorganism                               | Enzyme  | $k_{\text{cat}}$ (s <sup>-1</sup> ) | $K_m$ (M)            | $k_{\text{cat}}/K_m$ (M <sup>-1</sup> s <sup>-1</sup> ) | Ref. |
|-----------|---------------------------------------------|---------|-------------------------------------|----------------------|---------------------------------------------------------|------|
| Bacterial | <i>Pseudarthrobacter siccitolerans</i>      | PsG3Ox  | 0.2                                 | 0.4                  | 0.5                                                     | 2    |
|           | <i>Kitasatospora aureofaciens</i>           | KaP2Ox  | 15.4                                | $1.5 \times 10^{-3}$ | $1.0 \times 10^4$                                       | 3    |
|           | <i>Microbacterium sp. 5-2b</i>              | CarA    | nd                                  | -                    | -                                                       | 4    |
|           | <i>Arthrobacter globiformis</i>             | AgCarA  | nd                                  | -                    | -                                                       | 4    |
|           | <i>Microbacterium trichotheecenolyticum</i> | MtCarA  | nd                                  | -                    | -                                                       | 4    |
|           | <i>Streptomyces canus</i>                   | ScP2Ox  | > 0.38                              | > 2.0                | > 0.19                                                  | 5    |
| Fungal    | <i>Phlebiopsis gigantea</i>                 | PhgP2Ox | 40.5                                | $1.2 \times 10^{-3}$ | $3.4 \times 10^4$                                       | 6    |
|           | <i>Trametes multicolor</i>                  | TmP2Ox  | 54.0                                | $0.7 \times 10^{-3}$ | $7.3 \times 10^4$                                       | 7    |
|           | <i>Tricholoma matsutake</i>                 | TmaP2Ox | 111.0                               | $1.3 \times 10^{-3}$ | $8.7 \times 10^4$                                       | 8    |
|           | <i>Peniophora gigantea</i>                  | PegP2Ox | 56                                  | $1.1 \times 10^{-3}$ | $5.0 \times 10^4$                                       | 9    |
|           | <i>Peniophora sp.</i>                       | PsP2Ox  | 9.4                                 | $5.0 \times 10^{-3}$ | $1.8 \times 10^3$                                       | 10   |
|           | <i>Phanerochaete chrysosporium</i>          | PcP2Ox  | 83.1                                | $0.8 \times 10^{-3}$ | $9.9 \times 10^4$                                       | 11   |
|           | <i>Lyophyllum shimeji</i>                   | LsP2Ox  | 6.9                                 | $0.3 \times 10^{-3}$ | $2.2 \times 10^4$                                       | 12   |
|           | <i>Aspergillus nidulans</i>                 | AnP2Ox  | 35.4                                | $1.8 \times 10^{-3}$ | $2.0 \times 10^4$                                       | 13   |
|           | <i>Aspergillus oryzae</i>                   | AoP2Ox  | 1.5                                 | $2.9 \times 10^{-3}$ | $0.5 \times 10^3$                                       | 13   |
|           | <i>Irpex lacteus</i>                        | IIP2Ox  | 33.8                                | $0.7 \times 10^{-3}$ | $4.6 \times 10^4$                                       | 14   |

**Table S6. Optimal pH and apparent steady-state catalytic parameters for D-Glc of variants where mutation P336S was inserted (wild-type) or removed (2G4, 7E9 and 2B9) considered in this study.** Activity was measured using the HRP-AAP/DCHBS coupled assay. All reactions were performed in 100 mM sodium phosphate buffer at the optimal pH and 37 °C. The kinetic parameters were determined by fitting the data directly on the Michaelis-Menten equation using OriginLab.

| Enzyme          | Mutations                                                                       | Optimal pH | $k_{cat}$ ( $s^{-1}$ ) | $K_m$ (M)       | $k_{cat}/K_m$ ( $M^{-1}s^{-1}$ ) |
|-----------------|---------------------------------------------------------------------------------|------------|------------------------|-----------------|----------------------------------|
| wild-type       | -                                                                               | 7.0 – 7.5  | $0.2 \pm 0.05$         | $0.37 \pm 0.13$ | $0.5 \pm 0.1$                    |
| P336S           | + P336S                                                                         | 7.5 - 8.5  | $0.2 \pm 0.03$         | $0.54 \pm 0.11$ | $0.3 \pm 0.02$                   |
| 2G4             | K420R; V416I;<br>A327V; P336S;<br>A75T; A206T;<br>Q295H; G366S                  | 8.0        | $1.9 \pm 0.2$          | $0.26 \pm 0.05$ | $6.7 \pm 0.8$                    |
| 2G4<br>(-P336S) | K420R; V416I;<br>A327V; A75T;<br>A206T; Q295H;<br>G366S                         | 8.0 - 8.5  | $0.8 \pm 0.1$          | $0.28 \pm 0.03$ | $2.8 \pm 0.5$                    |
| 7E9             | A327V; D222G;<br>P336S; A75T;<br>A206T; Q295H;<br>G366S                         | 8.0        | $2.3 \pm 0.3$          | $0.27 \pm 0.05$ | $8.6 \pm 0.4$                    |
| 7E9<br>(-P336S) | A327V; D222G;<br>A75T; A206T;<br>Q295H; G366S                                   | 8.0 - 8.5  | $1.0 \pm 0.1$          | $0.28 \pm 0.03$ | $3.6 \pm 0.3$                    |
| 2B9             | A335T; K420R;<br>V416I; A327V;<br>D222G; P336S;<br>A75T; A206T;<br>Q295H; G366S | 8.0        | $2.6 \pm 0.3$          | $0.23 \pm 0.06$ | $10.6 \pm 0.9$                   |
| 2B9<br>(-P336S) | A335T; K420R;<br>V416I; A327V;<br>D222G; A75T;<br>A206T; Q295H;<br>G366S        | 8.0 - 8.5  | $0.7 \pm 0.1$          | $0.24 \pm 0.02$ | $3.0 \pm 0.2$                    |

**Table S7. Summary of stability properties of the evolutionary intermediates.** Apparent melting temperatures ( $T_m^{App}$ ) were measured by steady-state fluorescence following the intrinsic fluorescence of the enzyme, aggregation temperature ( $T_{agg}$ ) was monitored by static light scattering and half-life time at 40°C ( $t_{1/2}^{40°C}$ ) was measured by following the loss activity over time. The activity at each time point was measured using the HRP-AAP/DCHBS system.

| <b>Variant</b> | <b><math>T_m^{App}</math><br/>(°C)</b> | <b><math>T_{agg}</math> (°C)</b> | <b><math>t_{1/2}^{40°C}</math> (min)</b> |
|----------------|----------------------------------------|----------------------------------|------------------------------------------|
| WT+P336S       | 47 ± 2                                 | 45                               | Not detected                             |
| 2G4-P336S      | 55 ± 2                                 | 53                               | 990 ± 110                                |
| 7E9-P336S      | 56 ± 2                                 | 54                               | 2310 ± 260                               |
| 2B9-P336S      | 56 ± 3                                 | 55                               | 990 ± 213                                |

**Table S8. Optimal pH and apparent steady-state catalytic parameters for D-Glc of variants constructed using site-directed mutagenesis to assess the role of mutations G366S, A75T, A206T and Q295H.** Activity was measured using the HRP-AAP/DCHBS coupled assay. All reactions were performed in 100 mM sodium phosphate buffer at the optimal pH and 37 °C. The kinetic parameters were determined by fitting the data directly on the Michaelis-Menten equation using OriginLab.

| Enzyme    | Mutation                     | Optimal pH | $k_{\text{cat}}$ ( $\text{s}^{-1}$ ) | $K_{\text{m}}$ (M) | $k_{\text{cat}}/K_{\text{m}}$ ( $\text{M}^{-1}\text{s}^{-1}$ ) |
|-----------|------------------------------|------------|--------------------------------------|--------------------|----------------------------------------------------------------|
| wild-type | -                            | 7.0 – 7.5  | $0.2 \pm 0.05$                       | $0.37 \pm 0.13$    | $0.5 \pm 0.1$                                                  |
| 1A1       | G366S                        | 7.5        | $0.4 \pm 0.1$                        | $0.54 \pm 0.11$    | $0.7 \pm 0.1$                                                  |
| wild-type | + A75T                       | 7.5        | $0.2 \pm 0.03$                       | $0.59 \pm 0.14$    | $0.4 \pm 0.1$                                                  |
| wild-type | +A206T                       | 7.5        | $0.3 \pm 0.03$                       | $0.56 \pm 0.05$    | $0.5 \pm 0.1$                                                  |
| wild-type | +Q295H                       | 8.5        | $0.5 \pm 0.02$                       | $0.28 \pm 0.02$    | $1.8 \pm 0.1$                                                  |
| wild-type | +Q295H/G366S                 | 8.5        | $0.9 \pm 0.03$                       | $0.28 \pm 0.02$    | $3.2 \pm 0.3$                                                  |
| 5D5       | A75T; A206T;<br>Q295H; G366S | 8.5        | $1.0 \pm 0.2$                        | $0.33 \pm 0.05$    | $3.2 \pm 0.4$                                                  |



**Table S9. Summary of the described methods for synthesizing 3-keto-sugars and D-allose.** In the case of methods that use enzymes the abbreviations used are: G3Ox- Glycoside-3-oxidase; RPI- Ribose-5-phosphate isomerase; DAE- D-allulose-3-epimerase; GI- Glucose isomerase.

| Method                                     | Substrate                                     | Temp. (°C) | Number of steps (chemical or enzymatic)            | Yield (%) | Enzymes      | Chemicals used (other than solvents)                                                          | Product                 | Byproducts             | Additional information                                                                                                 | Ref.      |
|--------------------------------------------|-----------------------------------------------|------------|----------------------------------------------------|-----------|--------------|-----------------------------------------------------------------------------------------------|-------------------------|------------------------|------------------------------------------------------------------------------------------------------------------------|-----------|
| <b>Chemo-enzymatic (D-allose)</b>          | 1-O-benzyl-β-D-glucopyranoside                | 25 / 0     | 3 (oxidation; reduction; deprotection)             | 81        | G3Ox         | LS-selectride, Pd/C                                                                           | D-allose                | n.d.                   | No final purification is required.                                                                                     | This work |
| <b>Chemosynthesis (3-keto-sugars)</b>      | semi-protected saccharides                    | r.t.       | 1 (oxidation)                                      | 45-96     | none         | [(2,9-dimethyl-1,10-phenanthroline)-Pd(m-OAc)] <sub>2</sub> (OTf) <sub>2</sub> , benzoquinone | 3-keto-derivatives      | n.d.                   | -                                                                                                                      | 15        |
|                                            | semi-protected monosaccharides                | 50         | 1 (oxidation)                                      | >92       | none         | [(neocuproine)Pd-(OAc)] <sub>2</sub> (OTf) <sub>2</sub> , benzoquinone                        | 3-keto-derivatives      | C4 oxidized product    | A mixture of C3/C4 oxidation products is obtained for some substrates.                                                 | 16        |
|                                            | semi-protected monosaccharides                | 25         | 1 (oxidation)                                      | 21-70     | none         | Quinuclidine, Me <sub>4</sub> NBF <sub>4</sub> , HFIP, MeCN                                   | 3-keto-derivatives      | n.d.                   | For some substrates, 6-OH needs to be protected. Requires graphite electrodes.                                         | 17        |
| <b>Chemosynthesis (D-allose)</b>           | D-ribose                                      | n.i.       | 2 (cyanohydrin reaction; reduction)                | n.i.      | none         | Sodium amalgam, HCN, NaCN                                                                     | D-allose                | D-altronate            | -                                                                                                                      | 18        |
|                                            | 3-keto-sucrose                                | 30         | 2 (reduction; bacterial hydrolysis)                | 63        | none         | Raney nickel                                                                                  | D-allose                | n.d.                   | A bacterial strain was used to hydrolyze the glycosidic bond of the formed intermediate allosylfructose                | 19        |
|                                            | 1,2,5,6-di-O-isopropylidene-α-D-glucofuranose | 25         | 2 (reduction, hydrolysis)                          | 70        | none         | KIO <sub>4</sub> , K <sub>2</sub> CO <sub>3</sub> , RuO <sub>2</sub> , NaBH <sub>4</sub>      | D-allose                | n.i.                   | This method requires specific chromatographic steps.                                                                   | 20        |
|                                            | D-glucose                                     | n.i.       | 1 (epimerization)                                  | >7        | none         | Molybdenum                                                                                    | D-allose                | n.i.                   | -                                                                                                                      | 21        |
|                                            | D-glucose                                     | 120        | 1 (epimerization)                                  | 14        | none         | (NH <sub>4</sub> ) <sub>2</sub> MoO <sub>4</sub> , CH <sub>3</sub> COOH                       | D-allose                | D-altrose              | The final mixture was incubated with <i>S. cerevisiae</i> to remove residual glucose and mannose—complex purification. | 22        |
|                                            | D-glucose                                     | r.t. / 0   | 2 (oxidation, reduction)                           | 54        | none         | [(neocuproine)Pd-(OAc)] <sub>2</sub> (OTf) <sub>2</sub> , benzoquinone, NaBH <sub>4</sub>     | D-allose                | D-glucose              | The reduction step originates a mix of allose/glucose                                                                  | 23        |
|                                            | D-glucose                                     | r.t.       | 1 (epimerization)                                  | 42        | none         | 4-CzIPN, quinuclidine, Ad-SH, 4-CIOBzBu <sub>4</sub> N                                        | D-allose                | n.d.                   | Require a blue LED lamp.                                                                                               | 24        |
| <b>Biosynthesis (D-allose) – Izumoring</b> | D-allulose <sup>a</sup>                       | 65         | 1 (one step transformation)                        | 32        | RPI          | -                                                                                             | D-allose (not isolated) | n.d.                   | Low yields obtained due to the enzyme's reversibility. The substrate is expensive.                                     | 25        |
|                                            | D-fructose <sup>b</sup>                       | 60         | 2 (two-step transformation - 'one-pot')            | 13        | DAE, RPI     | -                                                                                             | D-allose (not isolated) | D-allulose             | Low yields due to the enzyme's reversibility                                                                           | 26        |
|                                            | D-glucose <sup>c</sup>                        | 30         | 1 ( <i>in vivo</i> fermentation – <i>E. coli</i> ) | n.i.      | GI, DAE, RPI | -                                                                                             | D-allose (not isolated) | D-allulose, D-fructose | Low yields due to the enzyme's reversibility. The substrate can be utilized in <i>E. coli</i> metabolic pathways.      | 27        |

r.t. - room temperature; n.i. - not indicated; n.d. - not detected.

<sup>a</sup> - There are other isomerase enzymes capable of converting D-allulose to D-allose. Still, like in this case, they remain reversible, leading to low yields and requiring product purification afterward to remove byproducts and/or the remaining initial substrate (The conversion yields range from 25% to 37.5%<sup>28</sup>).

<sup>b</sup> - Other epimerases and isomerases have also been used to convert D-fructose to D-allose, employing both one-pot reactions and sequential two-step processes. However, due to the reversibility of the system, yields remain similar (ranging from 10% to 13%<sup>28</sup>), and product purification is still required to remove the starting substrate.

<sup>c</sup> - Although the authors do not provide the production's quantitative yield, they mention it was 'quite low.'

## References

1. S. Mendes, C. Banha, J. Madeira, D. Santos, V. Miranda, M. Manzanera, M. R. Ventura, W. J. H. van Berkel and L. O. Martins, *J Mol Catal B Enzym*, 2016, **133**, S34-S43.
2. A. Taborda, T. Frazão, M. V. Rodrigues, X. Fernández-Luengo, F. Sancho, M. F. Lucas, C. Frazão, E. P. Melo, M. R. Ventura, L. Masgrau, P. T. Borges and L. O. Martins, *Nat Commun*, 2023, **14**, 7289.
3. P. L. Herzog, L. Sützl, B. Eisenhut, D. Maresch, D. Haltrich, C. Obinger and C. K. Peterbauer, *Appl Environ Microbiol*, 2019, **85**, 1-15.
4. T. Kumano, S. Hori, S. Watanabe, Y. Terashita, H. Y. Yu, Y. Hashimoto, T. Senda, M. Senda and M. Kobayashi, *Proc Nat Acad Sci*, 2021, **118**, e2106580118.
5. A. Kostelac, L. Sützl, J. Puc, V. Furlanetto, C. Divne and D. Haltrich, *Int J Mol Sci*, 2022, **23**, 13595.
6. A. Schafer, S. Bieg, A. Huwig, G. Kohring and F. Giffhorn, *Appl Environ Microbiol*, 1996, **62**, 2586-2592.
7. C. Leitner, J. Volc and D. Haltrich, *Appl Environ Microbiol*, 2001, **67**, 3636-3644.
8. Y. Takakura and S. Kuwata, *Biosci Biotechnol Biochem*, 2003, **67**, 2598-2607.
9. S. Bastian, M. J. Rekowski, K. Witte, D. M. Heckmann-Pohl and F. Giffhorn, *Appl Microbiol Biotechnol*, 2005, **67**, 654-663.
10. M. Bannwarth, D. Heckmann-Pohl, S. Bastian, F. Giffhorn and G. E. Schulz, *Biochem*, 2006, **45**, 6587-6596.
11. I. Pisanelli, M. Kujawa, O. Spadiut, R. Kittl, P. Halada, J. Volc, M. D. Mozuch, P. Kersten, D. Haltrich and C. Peterbauer, *J Biotechnol*, 2009, **142**, 97-106.
12. C. Salaheddin, Y. Takakura, M. Tsunashima, B. Stranzinger, O. Spadiut, M. Yamabhai, C. K. Peterbauer and D. Haltrich, *Microb Cell Fact*, 2010, **9**, 1-12.
13. I. Pisanelli, P. Wührer, Y. Reyes-Dominguez, O. Spadiut, D. Haltrich and C. Peterbauer, *Appl Microbiol Biotechnol*, 2012, **93**, 1157-1166.
14. M. Q. Ai, F. F. Wang, Y. Z. Zhang and F. Huang, *Process Biochem*, 2014, **49**, 2191-2198.
15. M. Jäger, M. Hartmann, J. G. de Vries and A. J. Minnaard, *Angew Chem Int Ed*, 2013, **52**, 7809-7812.
16. K. Chung and R. M. Waymouth, *ACS Catal*, 2016, **6**, 4653-4659.
17. M. Kidonakis, A. Villotet, M. D. Witte, S. B. Beil and A. J. Minnaard, *ACS Catal*, 2023, **13**, 2335-2340.
18. F. P. Phelps and F. Bates, *J. Am. Chem. Soc.*, 1934, **56**, 1250-1250.
19. M. J. Bernaerts, J. Furnelle and J. De Ley, *Biochim Biophys Acta*, 1963, **69**, 322-330.
20. D. C. Baker, D. Horton and C. G. Tindall, *Carbohydr Res*, 1972, **24**, 192-197.
21. *United States Pat.*, US5433793A, 1994.
22. V. Bílik and I. Knězek, *Chem Papers*, 1988, **42**, 401-405.
23. V. R. Jumde, N. N. H. M. Eisink, M. D. Witte and A. J. Minnaard, *J Org Chem*, 2016, **81**, 11439-11443.
24. Y. Wang, H. M. Carder and A. E. Wendlandt, *Nature*, 2020, **578**, 403-408.
25. S. J. Yeom, E. S. Seo, Y. S. Kim and D. K. Oh, *Appl Microbiol Biotechnol*, 2011, **89**, 1859-1866.
26. T. E. Lee, K. C. Shin and D. K. Oh, *J Microbiol Biotechnol*, 2018, **28** 3, 418-424.
27. L. Zheng, Q. Guo, Y. Zhang, C. Liu, L. Fan and H. Zheng, *Front. Bioeng. Biotechnol.*, 2022, **10**.
28. X. Tang, Y. Ravikumar, G. Zhang, J. Yun, M. Zhao and X. Qi, *Crit Rev Food Sci Nutr*, 2024, 1-28.
